# Supplementary material
Source: PubMed Central journal article supplement (PMC5927818)

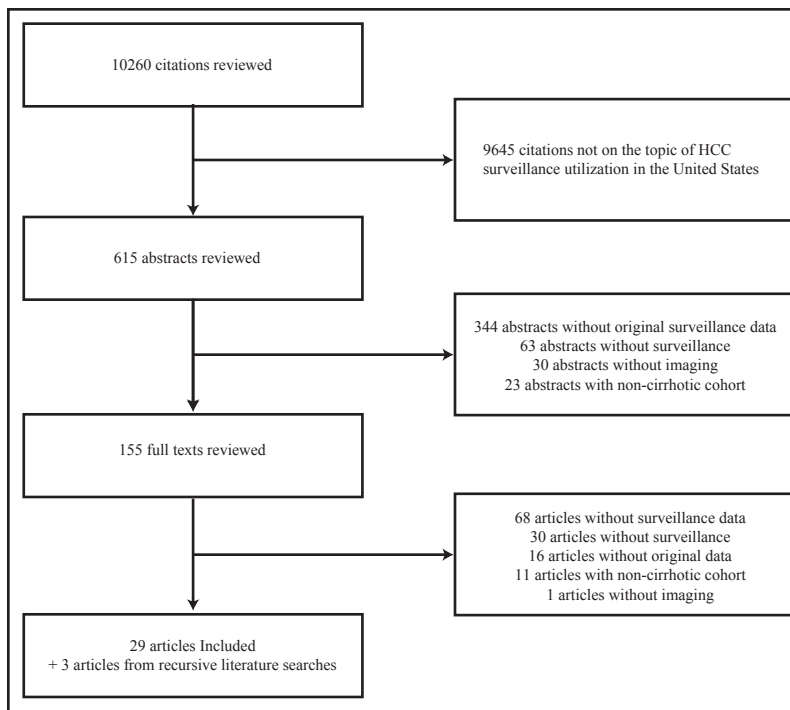

Supplement: NIHMS940431-supplement-1.pdf [file NIHMS940431-supplement-1.pdf]
